# Supplementary material for: Mining the A.E. Watkins Wheat Landrace Collection for Variation in Starch Digestibility Using a New High-Throughput Assay
Source: MDPI journal article supplement (doi:10.3390/foods12020266), 2023-01-06
Supplement: s1 [file s1]

|        |        |        |
|--------|--------|--------|
|        | 698    | 349    |
|        | 694    | 324    |
|        | 694    | 313    |
|        | 690    | Soison |
|        | 690    | 313    |
|        | 685    | 308    |
|        | Soison | 305    |
|        | 685    | 300    |
|        | 683    | 299    |
|        | 680    | 292    |
|        | 671    | 291    |
|        | 670    | 352    |
|        | 662    | 273    |
|        | 652    | 264    |
|        | 639    | 254    |
|        | 637    | 325    |
|        | 629    | 246    |
|        | 627    | 239    |
|        | 627    | 238    |
|        | Soison | Soison |
| 912    | 624    | 231    |
| 827    | 605    | 224    |
| 827    | 591    | Soison |
| 827    | 591    | 223    |
| 816    | 580    | 219    |
| 816    | Soison | 218    |
| 814    | 579    | 216    |
| 811    | 568    | Soison |
| Soison | 568    | 209    |
| 811    | 566    | 209    |
| 789    | 562    | Soison |
| 788    | 560    | 199    |
| 784    | 551    | 199    |
| 777    | 546    | 181    |
| 771    | 507    | 160    |
| 753    | 496    | 149    |
| 750    | 483    | 145    |
| 749    | 481    | 141    |
| 747    | 475    | 139    |
| Soison | Soison | Soison |
| 746    | 474    | 127    |
| 742    | 471    | Soison |
| 742    | 471    | 126    |
| 740    | 468    | 110    |
| 651    | Soison | 103    |
| 732    | 468    | 92     |
| 731    | 460    | 81     |
| Soison | 451    | 79     |
| 731    | 444    | Soison |
| 729    | 440    | 45     |
| 729    | 433    | 44     |
| 722    | 420    | 42     |
| 707    | 406    | 40     |
| 705    | 398    | 34     |
| 705    | 397    | 34     |
| 704    | 396    | 32     |
| 700    | 387    | 23     |
| 700    | 360    | 7      |
| 698    | 355    | 4      |
| Soison | Soison | Soison |

**Figure S1.** Field trial (1 m<sup>2</sup> plots at Church Farm, Norfolk UK (52°37'49.2"N 1°10'40.2"E)) of *c.Watkins*. Numbers represent the lines, and Soison was used as a standard for the field trial validation.

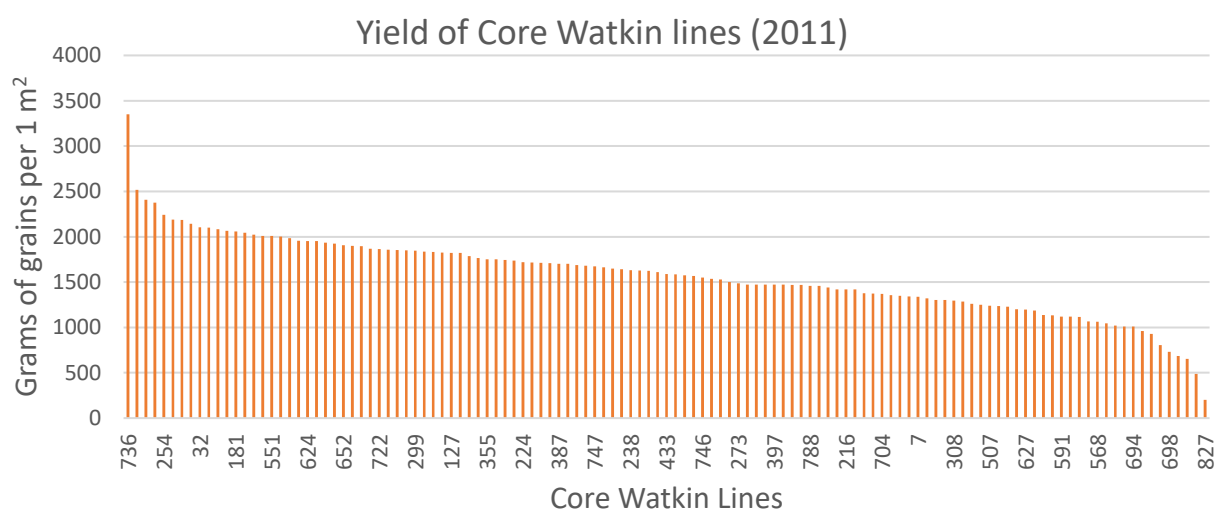

**Figure S2.** Core Watkins' collection yield (2011). Provided by Germplasm resources unit.

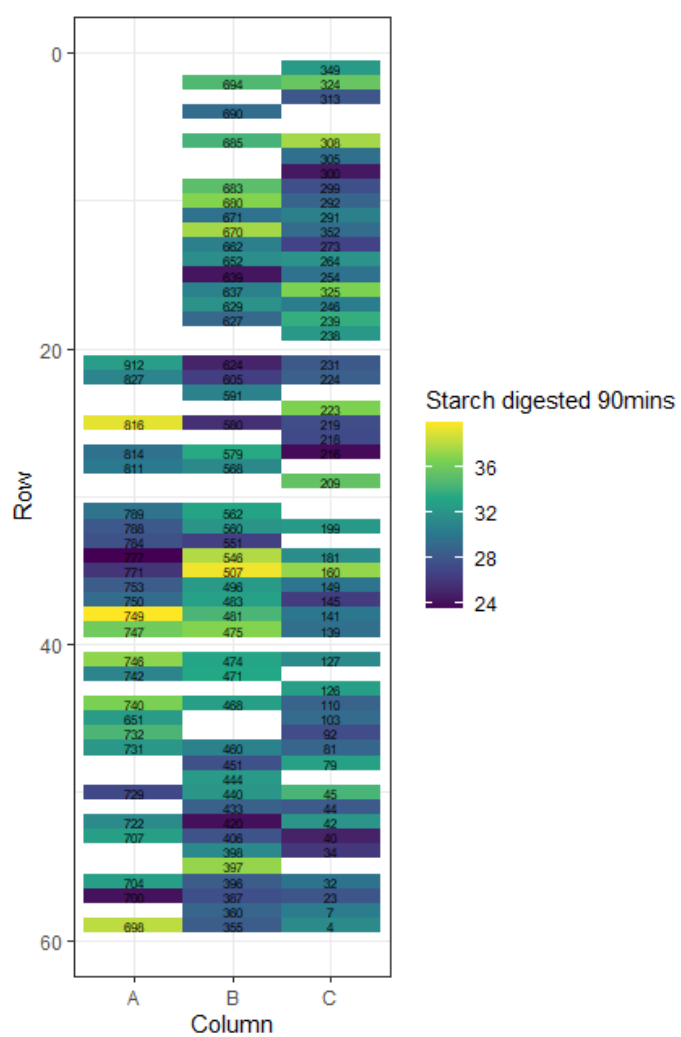

**Figure S3.** Field design of c. Watkins collection and starch digested (%) at 90 min.

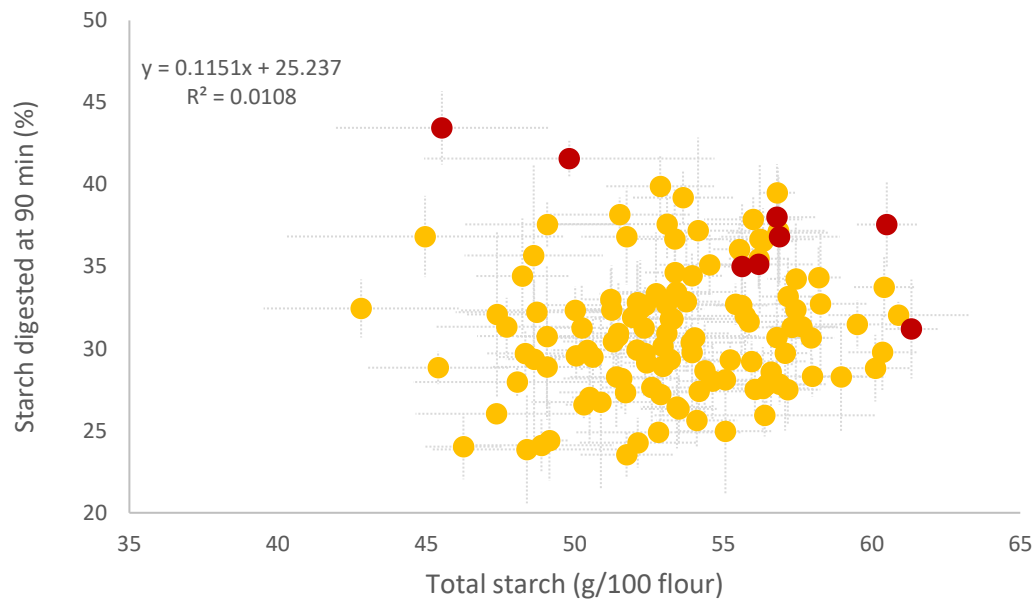

**Figure S4.** Scatter plot of starch digestibility (%) and total starch content (g/100 flour) of *c. Watkins* landraces (yellow) and elite varieties (red). Error bars represent  $\pm$  (SE).

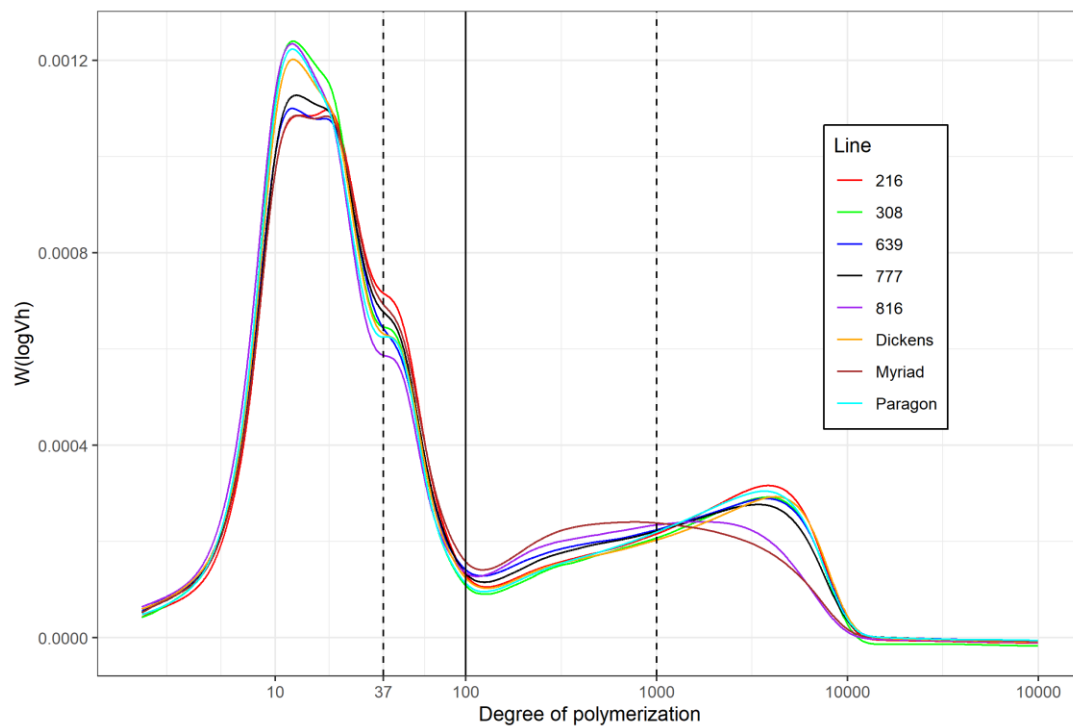

**Figure S5.** Starch chain-length distribution for selected wheat lines (216, 308, 639, 777, 816, Dickens, Myriad and Paragon). The Y-axis is expressed as  $w\text{LogVh}$ ; the X-axis is the degree of polymerization. The curves were normalised such that the sum of each was 1 over the plotted range. Each curve represents the mean of three technical replicates (except line 308 which had 2 technical replicates).

**Table S1.** Protein content of wholemeal flour was measured on a fresh weight basis. Coulter counter analysis for granule size distribution described as the relative volume of B-type granules (%), B-type granule diameter ( $\mu\text{m}$ ) and A-type granule diameter ( $\mu\text{m}$ ). Chain-length distribution was determined by SEC: amylopectin (AP) long to short chains (ratio of  $37 < x < 100$  to  $< 37$  DP), AM (amylose) long/short chains (ratio of  $> 1000$  to  $> 100$ - $1000$  DP), AM/AP (ratio of  $> 100$  to  $< 100$ ). Endogenous  $\alpha$ -amylase was determined as Ceralpha Units/g of flour. Values represent mean  $\pm$  SE. p-values are for comparisons made between the selected lines using ANOVA.

|                    | Lines   | Protein content (g/100 flour) | B granule (%) | B-type granule diameter ( $\mu\text{m}$ ) | A-type granule diameter ( $\mu\text{m}$ ) | AP long/short chains | AM long/short chains | AM/AP ratio | Endogenous $\alpha$ -amylase Ceralpha Units/g flour |
|--------------------|---------|-------------------------------|---------------|-------------------------------------------|-------------------------------------------|----------------------|----------------------|-------------|-----------------------------------------------------|
| p-value            |         | $p < 0.001$                   | ns            | $p < 0.01$                                | $p < 0.001$                               | $p < 0.001$          | $p < 0.005$          | ns          | $p < 0.05$                                          |
| Low Digestibility  | 639     | 15.1 (0.17)                   | 37.1 (1.9)    | 6.4 (0.2)                                 | 18.2 (0.1)                                | 0.23 (0.01)          | 0.94 (0.06)          | 0.32 (0.01) | 0.06 (0.01)                                         |
|                    | 777     | 14.2 (0.16)                   | 34 (2)        | 6 (0.1)                                   | 18.2 (0.2)                                | 0.24 (0.01)          | 0.93 (0.05)          | 0.30        | 0.07 (0.01)                                         |
|                    | 216     | 18.4 (0.05)                   | 28.6 (1.6)    | 8.4 (0.2)                                 | 20.1 (0.2)                                | 0.26                 | 1.10 (0.04)          | 0.29 (0.01) | 0.15 (0.01)                                         |
| High Digestibility | 308     | 14.9 (0.18)                   | 35.3 (1.7)    | 6.2 (0.1)                                 | 17.7                                      | 0.21 (0.01)          | 1.06 (0.06)          | 0.26 (0.02) | 0.13 (0.01)                                         |
|                    | Myriad  | 11.1 (0.22)                   | 34.2 (2.4)    | 6.7 (0.1)                                 | 19.2 (0.5)                                | 0.25                 | 0.84 (0.13)          | 0.29 (0.02) | 0.06 (0.01)                                         |
|                    | 816     | 17.4 (0.19)                   | 34.8 (0.7)    | 6.9 (0.4)                                 | 19 (0.5)                                  | 0.20 (0.01)          | 0.65 (0.05)          | 0.27 (0.03) | 0.09 (0.01)                                         |
|                    | Paragon | 13.5 (0.24)                   | 30.9 (1)      | 6.6 (0.1)                                 | 20.1 (0.2)                                | 0.21                 | 1.16 (0.14)          | 0.29 (0.01) | 0.05 (0.01)                                         |
|                    | Dickens | 10.6 (0.15)                   | 29 (3.3)      | 6.3 (0.2)                                 | 19.2 (0.3)                                | 0.22                 | 1.09 (0.04)          | 0.28        | 0.05 (0.01)                                         |

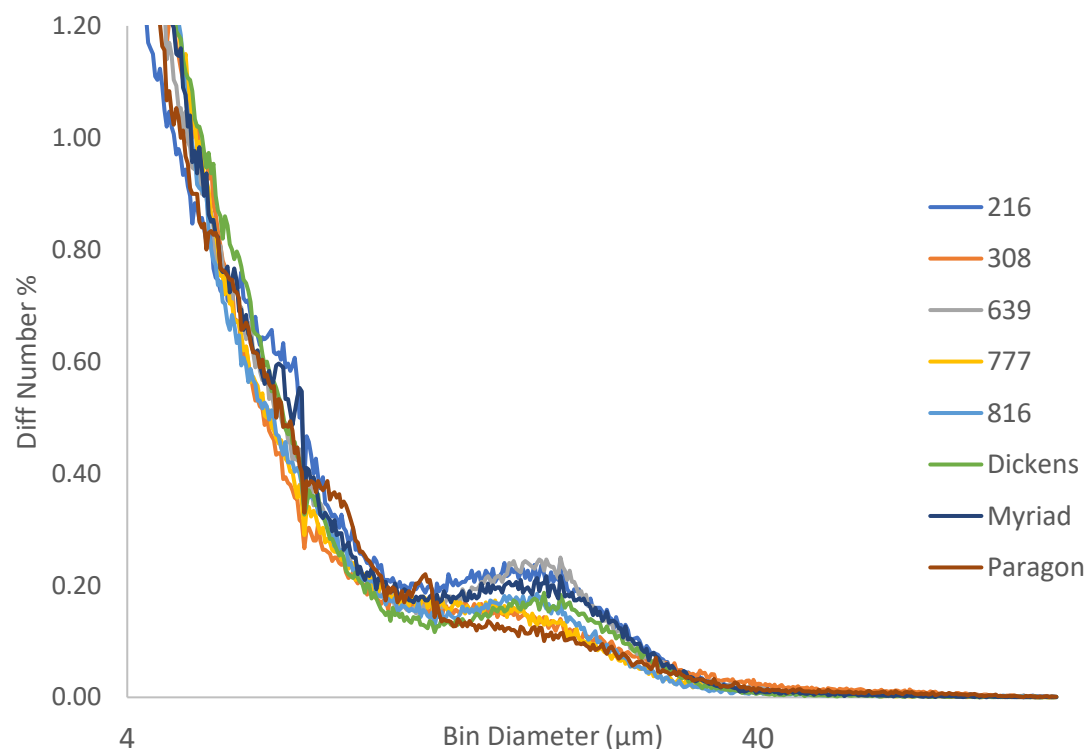

**Figure S6.** Differential Particle Size Distribution of wholemeal flour particles by Coulter counter analysis, data is shown on a log scale in the x-axis.

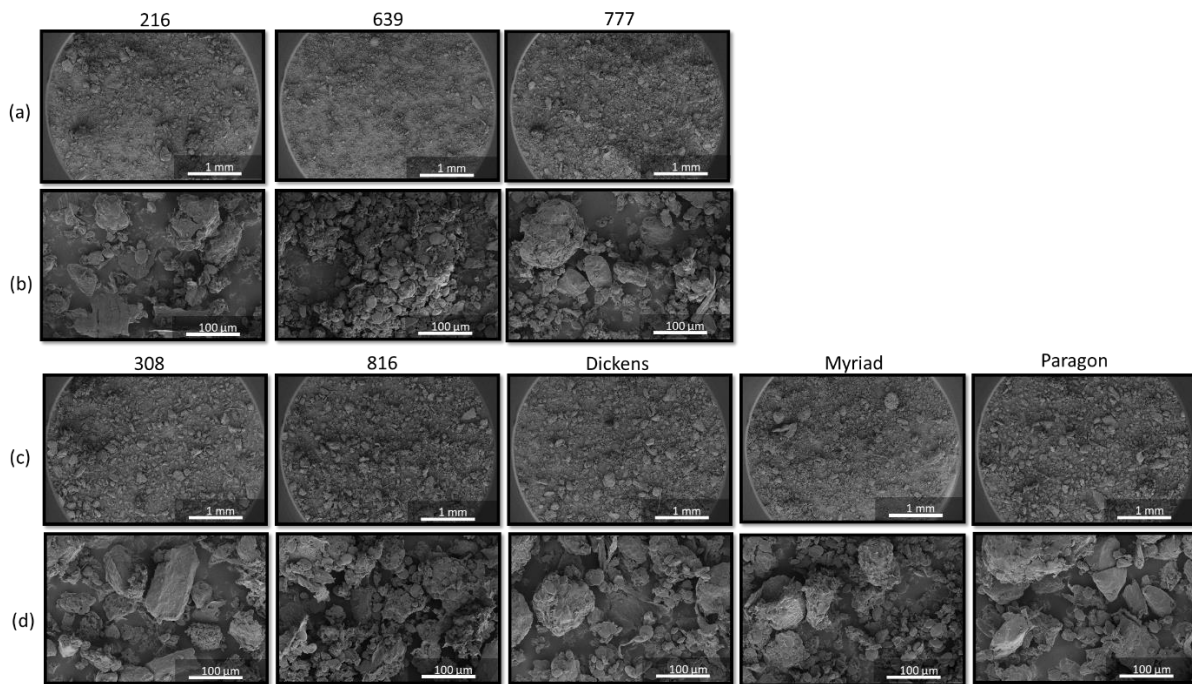

**Figure S7.** SEM micrographs of wholemeal flour for low- and high-digestibility lines. **(a)** and **(b)** are from low digestibility lines and **(c)** and **(d)** are from high digestibility lines.

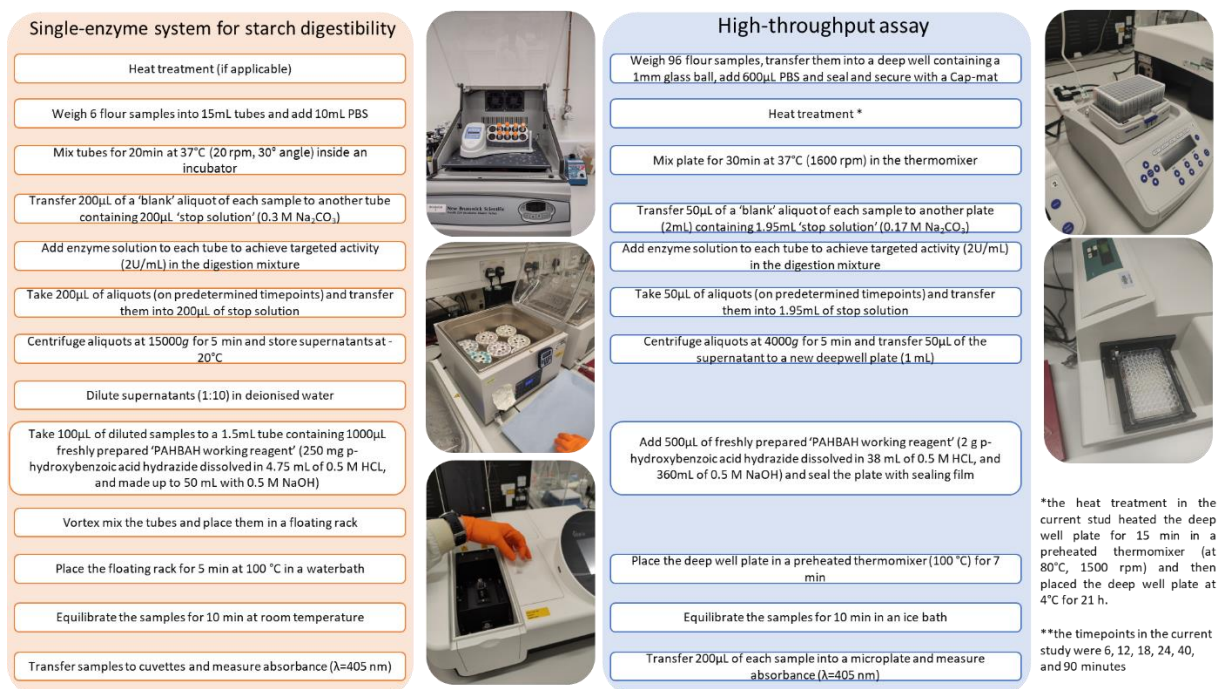

**Figure S8.** Comparison between the single-enzyme system (protocol from Edwards et al. 2019 [33]) for starch digestibility and HTA. \*the heat treatment in the current stud heated the deep well plate for 15 min in a preheated thermomixer (at 80°C, 1500 rpm) and then placed the deep well plate at 4°C for 21 h. \*\*the timepoints in the current study were 6, 12, 18, 24, 40, and 90 minutes.

## **Supplemental methods**

### **Size Exclusion Chromatography**

Size exclusion chromatography was used to determine chain-length distribution of debranched starch for select samples. A Waters Alliance e2695 HPLC (Milford, US) equipped with a refractive index detector (RI), autosampler (40°C), and column heater (90°C) was used for peak resolution by size exclusion. An isocratic mobile phase of DMSO with 0.5% LiBr (w/w) at 0.500 mL/min flow rate was used. The stationary phase was a guard column (8x50mm, GRAM; Polymer Standard Service, Mainz, DE) followed by two analytical columns in series (10µm; 300 Å followed by 30 Å; 8x300mm, GRAM; Polymer Standard Service, Mainz, DE). Total run time was 65 minutes and injection volume for each sample was 50 µL. Calibration curves were generated using pullulan standards (PSS-pulkit, Polymer Standard Service, Mainz, DE) with peak molecular weights ranging from 342 to 708,000 Da and correlation coefficients of  $R^2 = 0.9993 \pm 0.0005$ . Purified starch was solubilized and debranched enzymatically using methods adapted from Perez-Moral, *et al.* [54] Debranched starch samples were solubilized at a concentration of 8 mg/mL and standards at 2 mg/mL with DMSO containing 0.5% LiBr (w/w). All samples and standards were vortexed and stored at 80°C overnight prior to analysis. The relationship between elution volume and hydrodynamic radius ( $V_h$ ) for the linear glucans was determined using calibration curves described by [55] The debranched starch samples RI elution profiles were converted to SEC weight distributions as described in detail by Perez-Moral, *et al.* [54]. For the chain-length distribution analysis, both amylopectin (AP) and amylose (AM) chains were divided into short- and long-chain fractions based on their degree of polymerization (DP) (<37 DP and >37-100 DP for AP; >100-1000 and >1000 DP for AM), then the area under the curve was calculated for each line. To compare the samples, ratios of long/short AP, long/short AM and AM/AP were used.

### **Protein Content**

The protein content of wholemeal flour was measured using the AACC 46-30 Crude protein – combustion method [56] on a CE440 Elemental Analyser (Exeter Analytical, <https://www.exeteranalytical.co.uk/>). Protein (%) was calculated by multiplying obtained Nitrogen by a factor of 5.7.

### **Scanning electron microscopy**

Wholemeal flour was brushed onto a carbon tab and fixed to a SEM pin stub. Samples were visualised using a Nova NanoSEM 450 (FEI) scanning electron microscope.

### **Endogenous $\alpha$ -amylase**

Endogenous  $\alpha$ -amylase levels present in wholemeal flour samples were determined using the Ceralpha assay procedure following manufacturing instructions ( $\alpha$ -Amylase Assay Kit (Ceralpha Method), AOAC Method 2002.01; Megazyme, Bray, IE).

### **Particle size analysis of flour and starch**

Particle size analysis of wholemeal wheat flour and purified starch granules was carried out using a Multisizer 4e coulter counter (Beckman Coulter, Indianapolis, US). Samples (5 mg of flour or 10 mg of purified starch) were suspended in 1 mL of deionized water and mixed for 15 min on a rotating wheel. Suspensions were filtered through a sieve (200  $\mu$ m nylon mesh for the flour and 70  $\mu$ m nylon mesh for the starch) into 100 mL of Isoton II electrolyte solution (Beckman Coulter) before the analysis. The aperture tube used was 200  $\mu$ m for wholemeal flour and 70  $\mu$ m for the purified starch. A minimum of 100,000 particles were quantified. For starch samples, the mean diameter of A- and B-type granules and relative volumes were calculated according to [21]. All measurements were conducted with logarithmic bin spacing but are presented on a linear x-axis for clarity.
